# Supplementary material for: G&M3D 1.0: an Interactive Framework for 3D Model Construction and Forward Calculation of Potential Fields
Source: Copernicus journal article supplement (doi:10.5194/egusphere-2025-5357), 2026-01-23
Supplement: Supplementary file [file egusphere-2025-5357-AC1-supplement.pdf]

## **Reply to Reviews on “G&M3D 1.0: an Interactive Framework for 3D Model Construction and Forward Calculation of Potential Fields” by Wang et al.**

We thank two Reviewers for their careful reviews and comments on our manuscript entitled “**G&M3D 1.0: an Interactive Framework for 3D Model Construction and Forward Calculation of Potential Fields**” (ID: egosphere-2025-5357). All of these comments are addressed in this document. For clarity, the original reviewer comments are reproduced below in *italics*, and our responses are provided in regular font.

---

*# RC1:*

*The manuscript by Wang and co-authors presents G&M3D, a software package with a graphical user interface to create a set of three-dimensional subsurface bodies. The bodies are either based on basic geometric shapes or freely drawn with the mouse on individual profiles and then combined into a 3D volume. The software furthermore allows the user to assign density differences and magnetic properties to the bodies and forward model the resulting gravity anomalies and magnetic intensity as well as their gradients. The authors demonstrate the software’s capabilities in an application to the gravity anomaly caused by a real salt dome. The manuscript is well written, the text is clear in most places, and the content fits the scope of GMD. The Figures nicely illustrate how the graphical user interface looks and can be used.*

*There are some concerns/open questions regarding the flexibility and efficiency of the method, the accessibility of the software, and the clarity of the text. These can be addressed with moderate revisions. Please see the attached PDF for my comments.*

**Reply:** We sincerely thank the reviewer for the constructive comments. We appreciate the reviewer’s recognition of the relevance of G&M3D 1.0 to the scope of GMD, as well as the clarity of the manuscript and figures. The comments are very helpful for improving the flexibility, computational description, accessibility, and clarity of the software and manuscript. We have carefully revised the manuscript and the repository documentation accordingly. Detailed point-by-point responses are provided below.

**Major comments:**

*1) The authors often stress how efficient/fast computation is, but they are not using parallel approaches. I would like the authors to comment on the potential of further speed-up through parallelization. Did they deem it unnecessary with the current speed of the code? Would the implementation be problematic?*

**Reply:** Thanks for this valuable suggestion. Although the current BCE implementation is already efficient for moderate model sizes, we agree that parallelization is beneficial for larger and more finely discretized models. In the BCE algorithm, the forward responses are computed layer by layer along the z-direction, and the contribution from each layer can be evaluated independently before summation. Therefore, the algorithm is naturally suitable for parallelization, and the implementation is not problematic.

In the revised manuscript, we implement this capability in G&M3D 1.0 through task-based multithreading in standard C++, where layer-wise forward responses are launched asynchronously and collected after completion. To assess its practical effect, we test the same synthetic model discretized into  $200 \times 200 \times 200$  prisms under vertical magnetization conditions using 8 threads. The total computation time is reduced from 19.83 s in serial mode to 5.75 s in parallel mode, corresponding to an approximately **3.45-fold** speed-up. These results confirm that parallelization is feasible in the present framework and can further improve computational efficiency for larger forward-modelling problems. (page 8, lines 243-245; page 9, lines 246-248)

2) *The authors mention inversion a few times but as far as I can see, an inversion would have to be done one model at a time and all by hand. That is not feasible. For inversion, it would be necessary to be able to automatically change properties without the GUI. Good studies to look at would be Galley et al., 2020, Spang et al., 2022 or de la Varga et al., 2019.*

Galley, C. G., Lelièvre, P. G., & Farquharson, C. G. (2020). Geophysical inversion for 3D contact surface geometry. *Geophysics*, 85(6), K27-K45. <https://doi.org/10.1190/geo2019-0614.1>

Spang, A., Baumann, T. S., & Kaus, B. J. (2022). Geodynamic modeling with uncertain initial geometries. *Geochemistry, Geophysics, Geosystems*, 23(6), e2021GC010265. <https://doi.org/10.1029/2021GC010265>

de la Varga, M., Schaaf, A., and Wellmann, F. (2019) open-source stochastic geological modeling and inversion, *Geosci. Model Dev.*, 12, 1–32, <https://doi.org/10.5194/gmd-12-1-2019>.

**Reply:** Thanks. We agree that the original wording may have overstated the role of G&M3D 1.0 in inversion. The current version of G&M3D 1.0 is designed exclusively for 3D body construction and forward modelling; it currently lacks inversion capabilities and does not support automated model updates independent of the GUI. We mention inversion mainly because forward modelling is a fundamental component of any geophysical inversion and because the models created by G&M3D 1.0 can serve as robust initial models or synthetic benchmarks for inversion studies. In the revised manuscript, we have updated the relevant statements to clarify that G&M3D 1.0 is not intended as an inversion framework. (page 15, lines 378-379)

3) *If I understand correctly, the algorithm saves time by skipping layers that don't have any anomalous bodies, but as soon as a single anomalous prism is detected, the entire layer is computed. Would it not be more efficient to only compute anomalous prisms? The way I imagine the current implementation, a vertical needle (1x1x100 prisms) would take much longer to compute than a horizontal one (100x1x1 prisms). Can individual prisms not be skipped because of the matrix approach? Some clarification about this would help.*

**Reply:** Thanks. We agree that a vertically elongated body (e.g.,  $1 \times 1 \times 100$ ) requires more

computation time than a horizontally distributed body (e.g.,  $100 \times 1 \times 1$ ) in the present implementation. This is because the BCE calculation is performed layer by layer along the z-direction: all empty layers are bypassed, whereas any layer containing anomalous prisms must undergo a complete 2D convolution. Consequently, skipping empty layers is only a procedural optimization rather than the core algorithmic innovation. In the current matrix-based formulation, individual anomalous prisms within an active layer cannot be skipped independently.

To clarify this point, we have added a synthetic example in the revised manuscript. For a  $100 \times 100 \times 100$  case under vertical magnetization, two bodies with the same volume but different spatial distributions  $1 \times 1 \times 100$  prisms and  $100 \times 1 \times 1$  prisms require approximately **2.65 s** and **0.04 s**, respectively, for calculating gravity, magnetic, and gradient components. Although the vertically elongated case is less favorable for this layer-wise implementation, the absolute computation time remains highly acceptable due to the intrinsic efficiency of the BCE-framework. (page 8, lines 238-241)

*4) In section 2.2 and Figure 2, it is stated that the model domain and observation points are doubled in x- and y-direction but it is unclear what purpose this serves. Is it necessary for the computational method? Can other methods avoid this? How does this affect the computational performance.*

**Reply:** Thanks. We have clarified this point in the revised manuscript. In the BCE formulation, Eq. (21) is essentially a 2D linear convolution between the layer-wise model parameters and the kernel. Since the FFT-based approach inherently computes circular convolution, the model domain and observation points must be padded to twice their original dimensions in the x- and y-directions. This extension embeds the linear convolution into a circulant form, thereby eliminating wrap-around boundary artifacts. While this extension increases the size of the FFT arrays from  $N \times M$  to  $2N \times 2M$  (resulting in a fourfold increase in memory and per-layer computational cost), this overhead is negligible compared to the computational intensity of direct spatial domain summation. The BCE method thus retains a decisive advantage over non-FFT-based strategies. (page 6, lines 163-166; Figure 2)

*5) For both gravity anomalies and magnetic field anomalies, there are analytical solutions for buried spheres (e.g., Lowrie and Fichtner, 2020, p. 349). While the salt dome is a great example to highlight the capabilities of the irregular tool, a benchmark against these analytical solutions would be more convincing for the validation of the computational accuracy of the software. A setup with a few buried spheres could be used to test both gravity anomaly and magnetic field anomaly.*

**Reply:** Thanks. We agree that a benchmark against analytical solutions provides a more rigorous validation of the computational accuracy of G&M3D 1.0. In the revised manuscript, we have incorporated a new synthetic benchmark consisting of three buried spheres. Their centers are located at (50 m, 55 m, 50 m), (140 m, 75 m, 65 m), and (110

m, 155 m, 80 m), with radii of 20 m, 30 m, and 35 m, respectively. The computational domain ( $200\text{ m} \times 200\text{ m} \times 200\text{ m}$ ) is discretized into a high-resolution  $800 \times 800 \times 800$  grid. The resulting gravity and magnetic anomalies are compared against their respective analytical solutions, as shown in Figure R1. The maximum absolute residuals are  $7.5 \times 10^{-6}$  mGal for gravity and  $5.4 \times 10^{-3}$  nT for magnetic anomalies. These extremely low error levels confirm the high numerical precision of G&M3D 1.0. (page 9, lines 253-260; Figure 3)

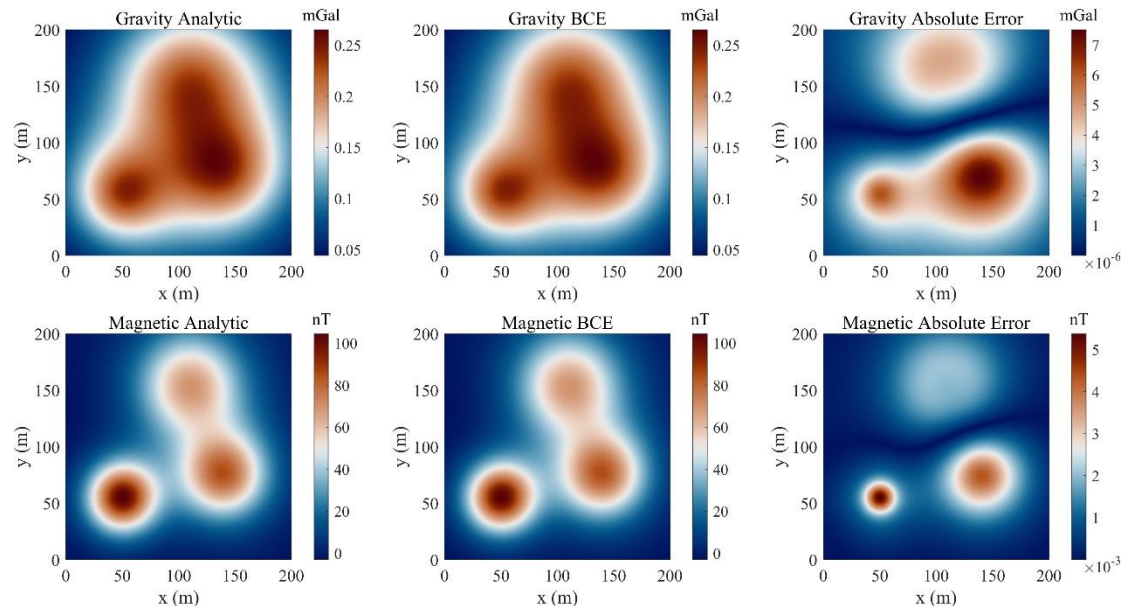

Figure R1: Comparison between analytical solutions and BCE results for gravity and magnetic anomalies produced by a synthetic model of three buried spheres.

6) *The manuscript makes no statement if and how the software can handle the existence of topography.*

**Reply:** Thanks for this practical suggestion. In the revised version, we have integrated topography-related functionality into G&M3D 1.0. The software now supports topographic model construction and 3D visualization (Figure R2), with a built-in constraint ensuring that anomalous bodies are correctly positioned beneath the topographic surface.

Furthermore, we have added a dedicated forward modelling module for topographic scenarios, enabling the calculation of gravity and magnetic anomalies, and their gradients at observation points with variable elevations (non-planar surfaces), as shown in Figure R3. The manuscript and figures have been updated to demonstrate these new topographic modelling capabilities. (page 9, lines 270-272; page 10, lines 283-285; page 13, lines 345-346; page 14, line 364; Figure 9; Figure 10)

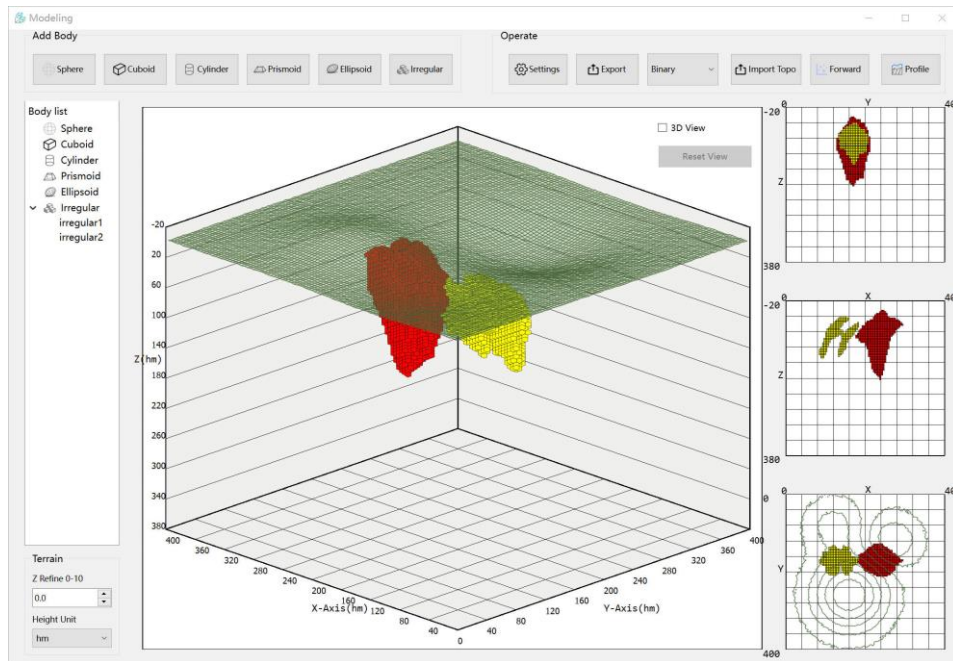

Figure R2: An irregular sulphide deposit model constructed using the Irregular tool.

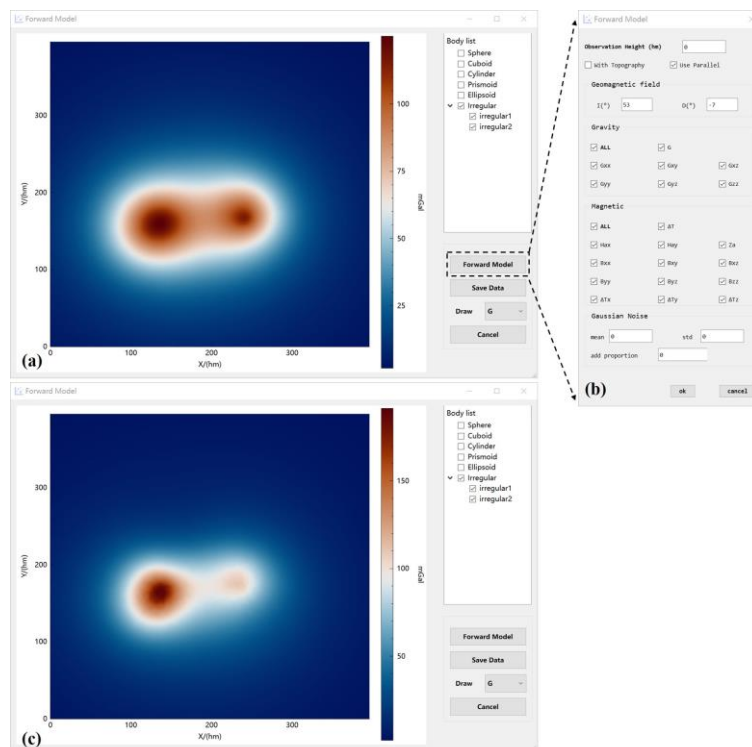

Figure R3: (c) Results calculated over undulating topography.

7) Another complication would be two anomalous bodies overlapping. For instance, a basaltic dike intruding into an older solidified granite intrusion. Can one body overwrite the properties of parts of another body?

**Reply:** Thanks. G&M3D 1.0 fully supports overlapping anomalous bodies. In cases of spatial overlap, the physical properties of the most recently created body will override

the properties assigned to the prisms in that region. This sequential overriding logic has been explicitly clarified in the revised manuscript to ensure the model construction process is well-defined and unambiguous. (page 11, lines 294-295)

*8) In the zenodo repository, the authors provide a Windows executable and source code, but there are no instructions on how to use the software on Linux or Mac. A Readme with clear instructions on how to compile and launch the software on all 3 systems would greatly improve the accessibility of the software. Without such instructions, it cannot fill the role of a community software as advertised in the manuscript.*

**Reply:** Thanks. Since Qt supports cross-platform development, we have expanded the software's accessibility in the updated release. We now provide a Linux-compatible version along with a comprehensive README file that outlines the compilation and deployment procedures for different environments. These resources are now available in the updated Zenodo repository (<https://zenodo.org/records/19674359>). While G&M3D 1.0 has not yet been bundled as a native macOS installer, macOS users can successfully build and run the software from source using the Qt framework. We have updated the repository documentation to explicitly state the supported platforms and provide clear build instructions, ensuring G&M3D 1.0 better serves the broader research community.

*9) The authors state that open-source options for gravity and magnetic forward modelling are rare. But they do exist and should be cited and discussed in line 67. Options include: simpeg (Cockett et al., 2015), geomIO (Bauville and Baumann, 2019), eventhough it depends on matlab, SRBF\_Soft (Ulug & Karshioğlu, 2022), Hogue et al., 2020, cited elsewhere in the manuscript, also Matlab. There seem to be more. Even if these don't exactly provide what the authors present, they are close enough to warrant acknowledgement and highlighting what advantages/disadvantages G&M3D has in comparison.*

Cockett, R., Kang, S., Heagy, L. J., Pidlisecky, A., & Oldenburg, D. W. (2015). SimPEG: An open source framework for simulation and gradient based parameter estimation in geophysical applications. *Computers & Geosciences*. <https://doi.org/10.1016/j.cageo.2015.09.015>

Bauville, A., & Baumann, T. S. (2019). geomIO: An open-source MATLAB toolbox to create the initial configuration of 2-D/3-D thermo-mechanical simulations from 2-D vector drawings.

Ulug, R., & Karshioğlu, M. O. (2022). SRBF\_Soft: a Python-based open-source software for regional gravity field modeling using spherical radial basis functions based on the data-adaptive network design methodology. *Earth Science Informatics*, 15(2), 1341-1353. <https://doi.org/10.1007/s12145-022-00790-y>

**Reply:** Thanks. In the revised manuscript, we have included the suggested references and expanded our literature review to provide a more comprehensive context. We now

acknowledge existing open-source tools such as SimPEG (Cockett et al., 2015), geomIO (Bauville and Baumann, 2019), SRBF\_Soft (Ulug and Karşlıoğlu, 2022), and the MATLAB-based software by Hogue et al. (2020). We have clarified that the distinctive contribution of G&M3D 1.0 lies in its seamless integration of interactive 3D body construction, gravity and magnetic forward calculation, and real-time visualization within a standalone GUI framework, specifically designed for users without programming expertise.

In addition, we conducted a head-to-head performance benchmark with SimPEG on a desktop equipped with an AMD Ryzen 7 3700X CPU (8 cores) and 32 GB RAM. For a  $200 \times 200 \times 200$  grid, G&M3D 1.0 completed the forward calculation in approximately **2.52 s**, whereas SimPEG required **1606.62 s**. Notably, when the resolution increased to  $800 \times 800 \times 800$ , SimPEG encountered a memory bottleneck and failed to complete the task, while G&M3D 1.0 maintained robust performance. This substantial performance gap further demonstrates the superiority of G&M3D 1.0 as a highly efficient tool for large-scale forward-modeling problems. (page 2, lines 67-74; page 9, lines 249-252)

*10) There is an inconsistency with the term density/density contrast. Equations 1-7 use rho for density contrast. Delta rho would be more appropriate. In the remainder of the text, the authors only use the term “density” while it should always be density contrast.*

**Reply:** Thanks. We agree and have standardized the terminology throughout the manuscript. Specifically, we now use  $\Delta \rho$  in Eqs. (1)-(7) and consistently apply the term “density contrast” throughout the text to ensure mathematical and conceptual accuracy. (page 3, Eqs. 1-7)

*11) A great feature for the Irregular tool would be the possibility to load semi-transparent images into the background of the drawing domain (Figure 7). This would allow the user to match results of imaging surveys much more effectively. I don't know how feasible this is from the software point of view, but it would be a great addition.*

**Reply:** Thanks for this excellent suggestion. We have successfully implemented the requested functionality in G&M3D 1.0. To facilitate reference-guided modeling, the Irregular tool also allows users to digitize geological bodies directly over geophysical or geological cross-sections, significantly improving modeling accuracy (Figure R4). (page 13, lines 329-330; Figure 8)

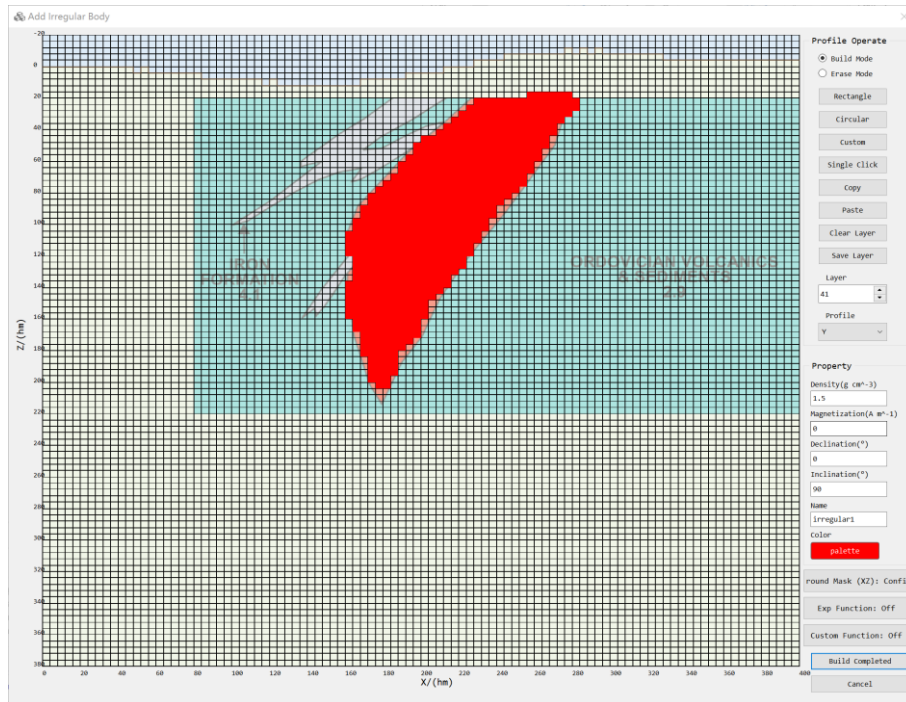

Figure R4: In this example, a screenshot adapted from Thomas (1997) is used as a semi-transparent background template to construct an irregular sulphide deposit with a density contrast of  $1.5 \text{ g} \cdot \text{cm}^{-3}$ .

12) The colormap used in Figures 9, 11, and 12 is not appropriate for scientific results. It is journal policy to use colormaps that allow readers with color deficiencies to interpret them. There are a number of perceptually uniform and deficiency friendly maps available in Matplotlib or at <https://www.fabiocrameri.ch/colourmaps/>.

**Reply:** Thanks. In the revised manuscript, we have replaced the original colormap with the perceptually uniform and color-deficiency-friendly “vik” colormap (Crameri, 2018) from <https://www.fabiocrameri.ch/colourmaps/>. Figures 9 and 11 (now Figures 10 and 12) have been redrawn to ensure scientific accessibility. (Figure 10; Figure 12) Crameri, F. (2018). Scientific colour maps. Zenodo. <https://doi.org/10.5281/zenodo.1243862>

13) Starting in line 164, the anomalous bodies are often referred to as models which is confusing as the whole domain should be the model in my opinion. Please stick with the term “body” or “anomalous body”. This also affects the list of bodies in the GUI.

**Reply:** Thanks. We have strictly distinguished “model” from “body” throughout the revised manuscript. The terminology and associated labels within the GUI have been updated accordingly to ensure consistency.

14) Please make sure that all units are given with positive or negative exponents instead of forward slash (i.e.,  $\text{g cm}^{-3}$  instead of  $\text{g/cm}^3$ ).

**Reply:** Thanks. We have standardized all units across the manuscript to use negative exponents instead of forward slashes.

**Minor comments:**

*G&M3D is an intuitive name, but the text should still state once what it stands for.*

**Reply:** Thanks. We have defined G&M3D at its first occurrence as “Gravity and Magnetic 3D modeling”.

*L. 12-13: Rephrase: However, open-source tools that allow for both the flexible and interactive construction of source models and potential-field forward calculations are rare.*

**Reply:** Revised as suggested.

*L. 14: “3D” has to be defined somewhere once.*

**Reply:** “3D” has now been defined at its first occurrence as “three-dimensional (3D)”.

*L. 16-19: First sentence is unclear and confusing considering the following sentence. I think what the authors want to say is that the domain is divided into rectangular prisms and the 3D shapes mentioned in the second sentence are approximated by a collection of angular prisms. Please clarify.*

**Reply:** Thanks. In the revised manuscript, we now explicitly state that G&M3D 1.0 facilitates the construction of complex 3D anomalous bodies, which are internally discretized into an assembly of rectangular prisms for high-efficiency forward calculation.

*L. 30: Give some examples of other less efficient techniques.*

**Reply:** Thanks. Revised as suggested.

“Compared with more logistically demanding methods, such as seismic reflection surveys and electrical surveys requiring dense electrode deployment, gravity and magnetic surveys generally offer simpler field procedures, lower acquisition costs, and greater efficiency for large-area data collection.”

*L. 66: Rephrase: Nonetheless, open-source options that .... are rare.*

**Reply:** Revised as suggested.

*L. 69: It's debatable whether C++ is considered a high-level programming language.*

**Reply:** Thanks.

“C++ is a widely used general-purpose programming language with strong computational performance and portability, making it well suited for numerical computing and scientific software development.”

*L. 70: Please provide a link and ideally a citation for Qt.*

**Reply:** Revised as suggested. “Qt (<https://wiki.qt.io>)”

*L. 74: I assume that the mentioned software is based on Qt. Express that explicitly.*

**Reply:** Revised as suggested.

“For instance, ... using standard C++ with the Qt library for gravity data interpretation.”

*L. 81: The sentence is a repetition of the previous one.*

**Reply:** Thanks. We have revised this part to avoid repetition.

*L. 88: Unclear what “mass volume” means.*

**Reply:** Thanks. We have revised this expression for clarity.

“the volume of an anomalous body”

*L. 92: Change to in-text citation, then colon, then equations. Same for magnetic equations.*

**Reply:** Thanks. Revised accordingly.

*Eq. 1:  $z$  should be  $z_0$ ? Same for other equations.*

**Reply:** Thanks. We have corrected this notation.

*Eq. 2-7: I guess “ $V$ ” are the gradients. Please add clarification. Also, “ $\Delta \rho$ ” would be more appropriate for density anomaly.*

**Reply:** Thanks. We have clarified that the terms  $V$  denote the components of the gradients. We have also replaced “ $\rho$ ” with “ $\Delta \rho$ ” to consistently represent density contrast.

*Eq. 8-10:  $\arctan$  should not be in Italics.*

**Reply:** Revised as suggested.

*Fig. 1: Observation point should be capital P.*

**Reply:** Revised as suggested.

*L. 101: sin and cos should not be in Italics. Same in equations 17-20.*

**Reply:** Revised as suggested.

*L. 102: “main magnetic field” appears to refer to the Earth’s magnetic field. Please clarify.*

**Reply:** Thanks. We have clarified that the “main magnetic field” refers to the Earth’s main magnetic field.

*L. 102: Then the scalar...*

**Reply:** Revised as suggested.

*L. 112: Should be  $P(x_n, y_m, z_0)$  for consistency.*

**Reply:** Revised as suggested.

*Eq. 21: Why semicolon instead of comma here?*

**Reply:** Thanks. We have revised Eq. (21) and the related text for clarity. The semicolon has been removed.

*L. 116: Does function  $t$  describe distance or decay of signal with distance? Please elaborate more.*

**Reply:** Thanks. Equation (21) is a unified and compact representation of Eqs. (1) to (16), where  $t$  denotes the kernel response at the observation point produced by a prism with unit density contrast or unit magnetization.

“Therefore,  $t$  represents the kernel (or sensitivity) coefficient, which can be evaluated using any of Eqs. (1) to (16), rather than a simple distance-dependent decay term.”

*L. 117: observation point  $P(\dots)$ .*

**Reply:** Revised as suggested.

*L. 130: it is unclear what this extension is for.*

**Reply:** Thanks. We have clarified that this extension is required because Eq. (21) is a linear convolution, while the FFT corresponds to circular convolution. The BCE extension is therefore used to avoid wrap-around errors.

“This extension is necessary because Eq. (21) represents a linear convolution, whereas

the FFT inherently evaluates a circular convolution. By embedding the original problem into an extended domain, the linear convolution can be reformulated in a circulant form and computed efficiently without introducing wrap-around boundary errors at the boundaries.”

*L. 133/134: it is also unclear why the field effects are computed in the extended area.*

**Reply:** Thanks. We have clarified that the extended area is only used as an auxiliary computational domain for the FFT-based implementation. The final results used in practice remain those within the original observation area.

“Note that the extended area serves only as an auxiliary computational domain; only the results within the original observation region are retained.”

*Fig. 2 caption: clarify that the extended observation points are red and source region observation points are black.*

**Reply:** Thanks. We have clarified this in the figure caption.

*L. 152: two strategies, not several.*

**Reply:** Revised as suggested.

*L. 159: explain what “vertical magnetization” means. Also, how does this affect gravity?*

**Reply:** Thanks. “vertical magnetization” refers to the case with a magnetization inclination of  $I'=90^\circ$ , for which the magnetization vector is parallel to the z-axis. In this case,  $k_{\{1\}}$  and  $k_{\{2\}}$  in Eqs. (8) to (16) are zero, and only  $k_{\{3\}}$  remains.

“vertical magnetization” does not affect gravity itself, because gravity depends only on density contrast. Rather, the gravity case and the magnetic case under vertical magnetization both admit simplified symmetric kernel structures, which improves computational efficiency. By contrast, this simplification is generally not available for non-vertical magnetization. In practice, magnetic data may also be transformed to a reduction to the pole (RTP) form to approximate the vertical-magnetization case.

*L. 169: I suggest using m or km instead of hm throughout the text. Hectometer is not a commonly used unit.*

**Reply:** Thanks. We have replaced hm with km.

*L. 173: I guess this is number of cells/prisms. Please clarify.*

**Reply:** Thanks. We have clarified that these values refer to the numbers of prisms in the x-, y-, and z-directions.

*Table 1, caption: I suggest replacing “grid numbers” with “numerical resolution”.*

**Reply:** Revised as suggested.

*Table 1: I assume that number of observation points did not change in this test. Please clarify.*

**Reply:** Thanks. In this test, the number of observation points scales with the numerical resolution, as they are defined at the horizontal centres of the prisms within the BCE-framework. We have clarified this in the revised manuscript. It is worth noting that user-defined observation locations can be accommodated via interpolation.

*Table 1: Please demonstrate that the scaling of the code holds for larger numbers of prisms. At least until  $800^3$ .*

**Reply:** Thanks. Following the reviewer’s suggestion, we have conducted additional benchmarks to demonstrate that G&M3D 1.0 maintains its performance scaling for larger models. These new results, including a  $800^3$  resolution case, have been added to Table 1.

*L. 180: “Table 1 shows...”*

**Reply:** Revised as suggested.

*L. 185: These numbers are in seconds?*

**Reply:** Thanks. Yes, these values are in seconds. We have clarified this in the revised manuscript.

*Fig. 4: Button in the GUI says “Setting” instead of “Settings”.*

**Reply:** Revised as suggested.

*Fig. 4, caption: missing space after (a). Also, last sentence is unclear.*

**Reply:** Thanks. We have corrected the missing space and revised the caption for clarity.

*L. 218: Ellipsoids would also be good.*

**Reply:** Following the reviewer’s suggestion, we have developed and integrated an Ellipsoid tool into G&M3D 1.0. A corresponding description of this feature and its implementation has been incorporated into Section 3 of the revised manuscript.

*Fig. 6: The 3 panels on the right don't seem to align with what is in the main panel. At the very least the x-coordinates of the dark blue prismoid are not correct.*

**Reply:** Thanks. We apologize for the misalignment in the original figure. We have corrected the coordinates in Fig. 6. In addition, to enhance spatial clarity and reduce visual ambiguity, we have added a 3D rotation function in the GUI.

*Fig. 9: "Forwarding Model" should be "Forward Model". "Heigh" should be "Height".*

**Reply:** Revised as suggested.

*Fig. 9, caption: No space after (a) and (b).*

**Reply:** Thanks. Revised accordingly.

*L. 301: include year of publication or replace "Ennen's" with "the author's".*

**Reply:** Thanks. Revised accordingly.

*L. 326: unit?*

**Reply:** Thanks. We have added the unit "mGal" for gravity anomalies and the unit "E" for gravity-gradient components in the revised manuscript.

*L. 327-328: This sentence is unnecessary in this context.*

**Reply:** Thanks. We have removed it from the revised manuscript.

*Fig. 11: What is the unit of  $V_{ij}$ ?*

**Reply:** Thanks. We have clarified the units in Figure 11. Specifically, mGal is used for the gravity field  $V_z$  (milligal), whereas E is used for the gradient components  $V_{ij}$  (Eötvös). We have also added the definitions ( $1\text{mGal} = 10^{-5} \text{ m s}^{-2}$  and  $1 \text{ E} = 10^{-9} \text{ s}^{-2}$ ) in the text for completeness.

*Fig. 12: label of colorbar is overlapping with " $\times 10^{-3}$ "*

**Reply:** Thanks. We have removed this figure from the revised manuscript. We find that the original difference map mainly reflected the limited precision of the gravitational constant used in the software. After updating the gravitational constant from two to four decimal places, the absolute differences decrease to the order of  $10^{-12}$ .

"The maximum absolute difference is  $1.2 \times 10^{-12}$  mGal for the gravity anomaly and  $1.3 \times 10^{-12}$  E for the gravity-gradient components."

*L. 340: remove “and” at the end of the line.*

**Reply:** Revised as suggested.

*References: Please provide DOIs for all references. This is journal policy.*

**Reply:** Thanks. We have checked the references and added DOIs where available.
